# Supplementary material for: Cats with Genetic Variants of AGXT2 Respond Differently to a Dietary Intervention Known to Reduce the Risk of Calcium Oxalate Stone Formation
Source: MDPI journal article supplement (doi:10.3390/genes13050791), 2022-04-28
Supplement: s1 [file s1]

**Table S1.** All untargeted biochemicals which had a p<0.1 when concentration on test food was compared to control in any genotype.

| Biochemical Name                   | GG TEST | AA TEST | AG TEST | GG TEST                                                                 | AA TEST | AG TEST |         |         |         |
|------------------------------------|---------|---------|---------|-------------------------------------------------------------------------|---------|---------|---------|---------|---------|
|                                    | GG CTRL | AA CTRL | AG CTRL | GG CTRL                                                                 | AA CTRL | AG CTRL |         |         |         |
|                                    |         |         |         | p-value                                                                 | q-value | p-value | q-value | p-value | q-value |
| glycine                            | 0.92    | 0.97    | 1.03    | 0.029960.135060.660720.504790.840400.576400069 2123 6337 4224 0425 7059 |         |         |         |         |         |
| sarcosine                          | 1.64    | 1.39    | 1.76    | 0.000810.036730.002960.075160.000240.041087492 4416 6577 4263 5183 8109 |         |         |         |         |         |
| dimethylglycine                    | 1.14    | 1.09    | 1.27    | 0.254060.407220.620210.492940.036080.162462933 9788 8065 256 7896 7472  |         |         |         |         |         |
| betaine                            | 2.28    | 2.06    | 2.6     | 2.072E-3.9852E1.556140.000240.000120.0315208 -06 E-06 971 5404 2945     |         |         |         |         |         |
| N-acetylserine                     | 0.93    | 0.9     | 1.17    | 0.022170.120570.096830.257850.007350.127938431 0985 9527 7023 7053 2774 |         |         |         |         |         |
| N-acetylthreonine                  | 0.85    | 0.85    | 1.08    | 0.003000.047610.042590.204300.165220.243588041 4135 0858 6918 7541 9669 |         |         |         |         |         |
| allo-threonine                     | 1.11    | 0.54    | 0.91    | 0.665590.625980.008650.122470.854860.579804632 8494 0362 9891 0249 4408 |         |         |         |         |         |
| N-methylalanine                    | 2.51    | 1.18    | 1.58    | 0.001000.036730.459420.431670.144000.22628785 4416 0935 8512 4028 0918  |         |         |         |         |         |
| N,N-dimethylalanine                | 0.45    | 0.51    | 0.48    | 0.026820.127361.3344E0.001280.115170.210559143 1579 -05 4769 405 6643   |         |         |         |         |         |
| aspartate                          | 0.89    | 0.91    | 1.17    | 0.107950.252450.093770.256480.274480.313621669 0363 1429 8137 7383 9361 |         |         |         |         |         |
| asparagine                         | 0.92    | 0.95    | 1.06    | 0.026460.127360.078660.245910.277790.315047446 1579 808 6263 0611 8798  |         |         |         |         |         |
| N-acetylaspargine                  | 0.81    | 0.85    | 1.02    | 0.066490.196750.002230.066390.850840.579611851 8971 8858 0469 0387 3827 |         |         |         |         |         |
| hydroxyasparagine                  | 0.81    | 0.85    | 0.96    | 0.001170.036730.007190.115490.148930.229671973 4416 7362 4559 0524 4679 |         |         |         |         |         |
| glutamate                          | 0.91    | 0.93    | 1.22    | 0.051060.171320.161240.318000.077800.190808426 6585 8381 8092 0464 3079 |         |         |         |         |         |
| glutamine                          | 0.95    | 0.95    | 1.05    | 0.013730.097570.167340.323580.258420.304982544 7835 3068 1916 8132 4095 |         |         |         |         |         |
| alpha-ketoglutamamate              | 1.26    | 1.2     | 1.67    | 0.002550.047610.070740.235120.006610.127931594 4135 2044 1437 8531 2774 |         |         |         |         |         |
| pyroglutamine                      | 1.28    | 1.3     | 1.83    | 0.006070.068150.001830.066390.009640.134699745 556 1886 0469 4319 0715  |         |         |         |         |         |
| N-acetyl-aspartyl-glutamate (NAAG) | 0.9     | 0.89    | 1.42    | 0.046460.164480.004670.094440.047530.182664832 9242 2102 7584 503 1208  |         |         |         |         |         |
| 2-pyrrolidinone                    | 0.83    | 0.92    | 1.24    | 0.033340.138620.182840.332910.288890.321717496 355 5047 3203 5191 7856  |         |         |         |         |         |
| histidine                          | 1.01    | 0.99    | 1.15    | 0.705120.632540.724470.519110.005690.127933226 422 4833 7628 9254 2774  |         |         |         |         |         |
| 3-methylhistidine                  | 0.97    | 0.96    | 1.06    | 0.676910.625980.423680.425810.071850.188740739 8494 5625 1742 584 5601  |         |         |         |         |         |
| N-acetylhistidine                  | 0.92    | 0.85    | 0.81    | 0.697640.630600.407450.420350.045590.182665821 4564 8987 1028 8932 1208 |         |         |         |         |         |
| imidazole propionate               | 1.29    | 1.21    | 1.88    | 0.004500.061660.068090.235120.003620.110355775 0247 6221 1437 6925 0299 |         |         |         |         |         |
| formiminoglutamate                 | 1.11    | 0.97    | 1.47    | 0.240340.396280.775520.533090.014090.147707511 6516 359 6551 2635 0418  |         |         |         |         |         |

|                                  |      |      |      |                                                                             |
|----------------------------------|------|------|------|-----------------------------------------------------------------------------|
| carnosine                        | 0.91 | 0.94 | 1.2  | 0.025250.127360.104620.265070.000740.06744<br>1276 1579 7845 6514 2393 0674 |
| N-acetylcarnosine                | 0.9  | 0.91 | 1.2  | 0.106810.252450.014340.153810.001520.08544<br>301 0363 2031 5112 9669 7992  |
| anserine                         | 0.78 | 0.87 | 1.51 | 0.127870.273010.124120.280270.029000.15852<br>6409 9429 2865 9855 8873 2177 |
| histamine                        | 0.96 | 1.14 | 1.65 | 0.949200.690690.460900.431670.204890.26756<br>8365 9436 788 8512 7736 1383  |
| 1-methyl-5-imidazoleacetate      | 1.01 | 1.11 | 1.47 | 0.844650.667630.570830.477930.023450.15765<br>8453 0561 8732 7813 5001 4649 |
| 1-ribosyl-imidazoleacetate       | 1.11 | 0.89 | 1.35 | 0.415200.521360.038570.204300.051850.18506<br>5689 3947 8467 6918 1087 7015 |
| 4-imidazoleacetate               | 1.43 | 1.2  | 1.85 | 0.018000.110020.203160.343620.050570.18506<br>4197 535 7304 1116 3966 7015  |
| lysine                           | 1    | 1.02 | 1.1  | 0.780760.658570.583520.481010.171080.24358<br>9641 4968 7271 4012 2479 9669 |
| N6-acetyllysine                  | 0.95 | 0.96 | 1.32 | 0.379340.499140.682990.510470.021770.15765<br>374 771 0199 8406 3323 4649   |
| N6-methyllysine                  | 0.95 | 0.99 | 0.99 | 0.065580.195080.348130.402680.993620.61306<br>7108 2128 6766 1864 639 8922  |
| N6,N6-dimethyllysine             | 0.94 | 0.95 | 1.15 | 0.006140.068150.282100.368900.006590.12793<br>1916 556 927 9448 4369 2774   |
| N6,N6,N6-trimethyllysine         | 0.91 | 0.95 | 1.13 | 0.004700.061660.502780.446570.093070.20282<br>1725 0247 6117 3973 3198 035  |
| hydroxy-N6,N6,N6-trimethyllysine | 0.7  | 0.79 | 1.29 | 0.001200.036730.139390.295600.235140.28833<br>9556 4416 0015 7347 118 1332  |
| 5-(galactosylhydroxy)-L-lysine   | 0.73 | 0.88 | 1.7  | 0.001050.036730.334490.396610.181360.24824<br>1721 4416 2492 5568 0472 2476 |
| 2-oxoadipate                     | 1.03 | 0.78 | 0.91 | 0.983320.699720.043170.204300.522370.43953<br>2618 4318 1484 6918 9539 2946 |
| glutaryl carnitine (C5-DC)       | 0.71 | 0.83 | 1.15 | 0.000930.036730.109520.267640.349460.36092<br>035 4416 7578 9647 6829 854   |
| 6-oxopiperidine-2-carboxylate    | 0.87 | 0.85 | 1.23 | 0.015240.101110.043240.204300.044030.18145<br>5115 4206 9665 6918 2607 1923 |
| 5-aminovalerate                  | 1.28 | 1    | 1.22 | 0.029590.134460.830250.546760.348040.36092<br>4687 5465 328 7435 2746 854   |
| N,N,N-trimethyl-5-aminovalerate  | 0.9  | 1    | 1.37 | 0.227770.389530.676120.506990.035160.16246<br>1571 2061 2308 0305 4008 7472 |
| phenylalanine                    | 0.95 | 0.95 | 1.09 | 0.029570.134460.056330.223880.129380.22050<br>7313 5465 0593 2146 6944 3478 |
| N-acetylphenylalanine            | 0.87 | 0.83 | 1.14 | 0.175340.333910.005620.102360.385650.37942<br>1135 9604 0234 2942 5129 4363 |
| phenyllactate (PLA)              | 0.99 | 0.88 | 1.09 | 0.965560.695680.085060.249170.593730.46997<br>9561 4408 9734 401 9191 7996  |
| 2-hydroxyphenylacetate           | 1.09 | 0.96 | 1.08 | 0.086480.226840.456640.431610.202980.26732<br>8483 872 6516 4187 4348 4439  |
| tyrosine                         | 0.98 | 0.92 | 1.15 | 0.375440.497270.247470.355730.085820.19882<br>7209 6584 4319 5911 0341 7981 |
| N-acetyltyrosine                 | 0.81 | 0.85 | 1.22 | 0.017380.109060.082630.247200.174550.24426<br>9436 8265 3391 3017 9076 7837 |
| m-tyramine sulfate               | 1.01 | 0.81 | 1.07 | 0.740070.643140.040840.204300.478520.42355<br>9089 7796 3454 6918 7312 0693 |
| 3-(4-hydroxyphenyl)lactate       | 0.97 | 0.91 | 1.15 | 0.229600.390130.131150.283120.068140.18874<br>0969 8436 2652 0417 7978 5601 |

|                                |      |      |      |                                                                             |
|--------------------------------|------|------|------|-----------------------------------------------------------------------------|
| dopamine 3-O-sulfate           | 0.91 | 0.87 | 1.36 | 0.139110.288760.671450.505820.016580.14770<br>7876 1225 9025 8125 6722 0418 |
| 3-hydroxyphenylacetate sulfate | 3.03 | 1.58 | 3.01 | 0.239170.396280.053260.217280.473260.42117<br>4495 6516 0376 5946 8021 6529 |
| C-glycosyltryptophan           | 0.89 | 0.84 | 1.24 | 0.006690.070190.037430.204300.045310.18266<br>0699 5544 3714 6918 646 1208  |
| kynurenine                     | 0.99 | 0.93 | 1.2  | 0.731970.639310.199800.343250.055120.18785<br>9849 6219 9726 149 7762 1722  |
| anthranilate                   | 1.73 | 0.79 | 0.92 | 0.063540.192180.329690.391890.625000.48283<br>534 4883 673 4378 2286 6437   |
| 5-hydroxyindoleacetate         | 1.03 | 0.85 | 1.55 | 0.531340.560520.422640.425810.015560.14770<br>9985 3826 692 1742 3332 0418  |
| indolelactate                  | 0.96 | 0.9  | 1.14 | 0.416260.521360.042910.204300.291010.32253<br>7497 3947 2584 6918 2708 1196 |
| indoleacetyl glycine           | 0.75 | 0.84 | 1.17 | 0.087380.227120.142200.297640.328170.34588<br>0067 2484 6471 661 3115 4915  |
| indoleacetoylcarnitine         | 1.58 | 1.59 | 3.88 | 0.141240.292120.099760.259600.017990.14932<br>5234 608 3583 3011 9153 7958  |
| 5-hydroxyindole sulfate        | 0.68 | 0.62 | 2.17 | 0.438910.527990.080400.246540.197150.26291<br>0316 6766 6119 6513 5563 4591 |
| 3-indoxyl sulfate              | 0.85 | 0.76 | 1.5  | 0.909480.681540.860760.553230.017710.14932<br>999 1341 2315 6525 1234 7958  |
| 6-bromotryptophan              | 0.9  | 0.87 | 1.1  | 0.068970.199000.068800.235120.153060.23324<br>3741 0661 1597 1437 4544 7518 |
| 1-carboxyethylleucine          | 0.89 | 0.81 | 1.08 | 0.211390.370770.058590.223880.787670.55853<br>935 3325 7703 2146 5723 2215  |
| alpha-hydroxyisocaproate       | 0.88 | 0.88 | 0.96 | 0.009720.091950.228980.352180.759870.54615<br>0701 3548 1997 1402 5659 6183 |
| isovaleryl glycine             | 0.94 | 0.75 | 0.96 | 0.324960.454700.027780.201000.589510.46947<br>5684 1605 1155 9166 4623 6062 |
| isovalerylcarnitine (C5)       | 1.32 | 1.44 | 1.85 | 0.022380.120570.041300.204300.011350.13539<br>0322 0985 779 6918 0164 9681  |
| beta-hydroxyisovalerate        | 1.08 | 0.87 | 1.6  | 0.418100.521360.085670.249170.008520.13469<br>8712 3947 7252 401 6846 0715  |
| 3-methylglutaconate            | 0.88 | 0.96 | 1.22 | 0.005340.063010.556670.473040.027300.15765<br>1269 1514 7081 7144 7626 4649 |
| N-acetyl isoleucine            | 0.57 | 0.62 | 3.21 | 0.017050.108140.163340.319560.083530.19805<br>4965 5927 0615 2564 4145 4444 |
| 1-carboxyethylisoleucine       | 0.9  | 0.74 | 0.96 | 0.208250.369100.067510.235120.332900.35014<br>5065 1724 3176 1437 8188 1495 |
| 2-hydroxy-3-methylvalerate     | 0.93 | 0.9  | 1.04 | 0.038530.149240.439340.427270.934050.59744<br>7114 289 1798 4271 9393 6399  |
| 2-methylbutyrylcarnitine (C5)  | 0.8  | 1.04 | 1.4  | 0.011990.095650.570860.477930.068530.18874<br>3686 178 0271 7813 2748 5601  |
| tiglylcarnitine (C5:1-DC)      | 0.8  | 0.8  | 0.88 | 0.001540.039770.077500.244920.379280.37610<br>8861 9476 5627 1099 4134 0334 |
| 3-hydroxy-2-ethylpropionate    | 0.9  | 0.99 | 1.43 | 0.063860.192180.885360.558600.065960.18874<br>2007 4883 5669 8522 4564 5601 |
| ethylmalonate                  | 0.91 | 0.82 | 1.07 | 0.060570.186910.035830.204300.316330.33837<br>313 2842 9841 6918 9154 7979  |
| methylsuccinate                | 0.95 | 0.83 | 1.1  | 0.425780.522020.015960.153810.097380.20282<br>6126 9768 3196 5112 9387 035  |
| N-acetylvaline                 | 0.9  | 0.85 | 1.1  | 0.079090.211280.129610.283120.241020.29194<br>0488 6252 7665 0417 5771 0619 |

|                                |      |      |      |                                                                             |
|--------------------------------|------|------|------|-----------------------------------------------------------------------------|
| 1-carboxyethylvaline           | 0.91 | 0.83 | 1.06 | 0.330820.458880.131570.283120.025550.15765<br>5748 8004 288 0417 5263 4649  |
| alpha-hydroxyisovalerate       | 0.85 | 0.91 | 1.09 | 0.000330.023660.099360.259600.685790.51613<br>5036 4592 6123 3011 7423 8658 |
| isobutyrylcarnitine (C4)       | 0.82 | 0.95 | 1.17 | 0.003870.058840.737480.524410.351920.36092<br>4929 1112 4904 3525 0898 854  |
| methionine                     | 1.12 | 1.07 | 1.26 | 0.012460.096170.160060.318000.001070.06744<br>9937 228 1167 8092 3161 0674  |
| N-acetylmethionine             | 0.87 | 0.83 | 1.16 | 0.010850.095580.015730.153810.025720.15765<br>5207 3799 4523 5112 8736 4649 |
| N-formylmethionine             | 0.89 | 0.91 | 1.17 | 0.002210.044430.043530.204300.011250.13539<br>3627 422 8597 6918 3124 9681  |
| S-methylmethionine             | 1.34 | 1.44 | 1.25 | 0.244880.401430.024120.185950.309710.33333<br>1209 3424 0673 5146 1829 3728 |
| methionine sulfone             | 1.12 | 1.09 | 1.22 | 0.022520.120570.191280.337300.015710.14770<br>2129 0985 4905 8644 8841 0418 |
| methionine sulfoxide           | 1.17 | 1.06 | 1.24 | 0.001650.039770.420700.425810.003940.11035<br>4511 9476 1765 1742 7147 0299 |
| N-acetylmethionine sulfoxide   | 0.83 | 0.78 | 1.16 | 0.034480.138620.339540.396740.854540.57980<br>0923 355 4384 2525 8992 4408  |
| S-adenosylhomocysteine (SAH)   | 1.47 | 1.07 | 1.41 | 0.080700.214090.457250.431610.024580.15765<br>9609 0873 2902 4187 3598 4649 |
| cystathionine                  | 0.93 | 0.94 | 1.4  | 0.138070.287620.497730.443720.011020.13539<br>3003 7054 0691 1097 5386 9681 |
| lanthionine                    | 0.91 | 0.9  | 1.26 | 0.076390.207460.086000.249170.060530.18785<br>9293 731 4523 401 1745 1722   |
| cysteine sulfinic acid         | 0.87 | 0.9  | 0.92 | 0.049940.169520.121810.280270.404960.38578<br>494 8728 5941 9855 3606 3066  |
| hypotaurine                    | 0.91 | 0.93 | 1.12 | 0.074960.207460.528930.465040.108940.20601<br>4682 731 6569 5909 3483 8928  |
| N-acetyltaurine                | 0.91 | 0.91 | 1.05 | 0.036350.143660.123320.280270.176680.24426<br>0782 8527 5238 9855 3019 7837 |
| succinoyltaurine               | 0.86 | 0.85 | 1.28 | 0.093620.235240.177560.331960.022070.15765<br>1611 3938 3981 2142 9993 4649 |
| argininosuccinate              | 0.76 | 0.79 | 1.05 | 0.041130.154850.122130.280270.847810.57833<br>3301 5191 0624 9855 7705 8356 |
| urea                           | 0.99 | 0.93 | 1.11 | 0.836620.667460.042400.204300.106890.20601<br>7303 9362 5413 6918 1929 8928 |
| citrulline                     | 0.96 | 0.97 | 1.17 | 0.482440.537430.655350.503650.095290.20282<br>9096 0697 4376 8993 0324 035  |
| homocitrulline                 | 0.89 | 0.94 | 1.24 | 0.097910.239390.366630.404180.073450.18874<br>0409 6389 0201 1603 386 5601  |
| proline                        | 1.05 | 0.99 | 1.08 | 0.096810.238300.755110.527860.373200.37227<br>4785 8523 9111 6231 1257 1307 |
| dimethylarginine (SDMA + ADMA) | 0.95 | 0.95 | 1.08 | 0.014440.100300.363940.404180.080470.19545<br>9911 9412 7429 1603 556 2245  |
| N-acetylarginine               | 0.81 | 0.92 | 1.16 | 0.055080.177580.530890.465040.239890.29131<br>6761 0363 3412 5909 2631 5484 |
| N-delta-acetylornithine        | 0.95 | 0.89 | 0.92 | 0.311970.448920.015260.153810.939500.60016<br>4296 6427 2135 5112 2986 4682 |
| trans-4-hydroxyproline         | 0.65 | 0.68 | 0.63 | 2.546380.003670.003230.077750.002000.10092<br>E-05 3363 0244 258 7448 3243  |
| pro-hydroxy-pro                | 1.09 | 1.04 | 1.22 | 0.574050.580110.257160.358690.141740.22479<br>1683 7034 1103 8521 0841 298  |

|                                              |      |      |      |         |         |         |         |         |         |
|----------------------------------------------|------|------|------|---------|---------|---------|---------|---------|---------|
| N-methylproline                              | 0.72 | 0.93 | 0.97 | 0.00257 | 0.04761 | 0.71720 | 0.51698 | 0.81575 | 0.56802 |
| N,N,N-trimethyl-alanylproline betaine (TMAP) | 0.87 | 1.06 | 1.42 | 7356    | 4135    | 8225    | 4541    | 8148    | 9937    |
| N-monomethylarginine                         | 0.93 | 0.96 | 1.04 | 0.01899 | 0.11070 | 0.54140 | 0.46759 | 0.03335 | 0.16246 |
| argininate                                   | 0.89 | 1.49 | 2.83 | 3985    | 8667    | 9876    | 0689    | 3313    | 7472    |
| guanidinoacetate                             | 1.2  | 1.13 | 1.42 | 0.07538 | 0.20746 | 0.44895 | 0.42892 | 0.43088 | 0.40041 |
| creatine                                     | 1.01 | 0.94 | 1.45 | 7942    | 731     | 6071    | 5104    | 6663    | 7259    |
| creatinine                                   | 0.95 | 0.98 | 1.05 | 0.45454 | 0.52976 | 0.06372 | 0.23240 | 0.07105 | 0.18874 |
| putrescine                                   | 1.22 | 1.06 | 1.29 | 5979    | 1636    | 5134    | 5414    | 1886    | 5601    |
| N-acetylputrescine                           | 1.09 | 0.76 | 1.42 | 0.02207 | 0.12057 | 0.21853 | 0.34891 | 0.06183 | 0.18874 |
| N-carbamoylputrescine                        | 1.35 | 1.56 | 1.76 | 9095    | 0985    | 8303    | 5076    | 715     | 5601    |
| N-acetyl-isoputrescine                       | 0.91 | 0.92 | 1.11 | 0.96973 | 0.69598 | 0.30483 | 0.38103 | 0.00417 | 0.11035 |
| N('1)-acetylspermidine                       | 1.13 | 1.08 | 1.25 | 4363    | 1136    | 0304    | 16      | 0423    | 0299    |
| 5-methylthioadenosine (MTA)                  | 1.05 | 0.93 | 1.34 | 0.00746 | 0.07556 | 0.59172 | 0.48445 | 0.09843 | 0.20282 |
| 4-acetamidobutanoate                         | 0.84 | 0.84 | 1.93 | 4181    | 2799    | 6032    | 4247    | 609     | 035     |
| glutathione, oxidized (GSSG)                 | 0.77 | 0.99 | 1.37 | 0.18824 | 0.34703 | 0.43562 | 0.42654 | 0.09752 | 0.20282 |
| cysteine-glutathione disulfide               | 0.96 | 0.99 | 1.19 | 2268    | 5211    | 6288    | 8407    | 6437    | 035     |
| S-methylglutathione                          | 0.95 | 1.04 | 1.8  | 0.13763 | 0.28762 | 0.55536 | 0.47304 | 0.03608 | 0.16246 |
| cysteinylglycine disulfide                   | 1.15 | 1.19 | 1.21 | 5913    | 7054    | 9399    | 7144    | 3577    | 7472    |
| 5-oxoproline                                 | 0.9  | 0.88 | 0.96 | 0.06769 | 0.19823 | 0.02433 | 0.18595 | 0.05621 | 0.18785 |
| 2-aminobutyrate                              | 0.91 | 1.1  | 1.08 | 7806    | 1369    | 5447    | 5146    | 4865    | 1722    |
| 2-hydroxybutyrate/2-hydroxyisobutyrate       | 0.8  | 0.84 | 0.86 | 0.00414 | 0.06096 | 0.40777 | 0.42035 | 0.10817 | 0.20601 |
| Ophthalmate                                  | 0.71 | 0.94 | 1.55 | 9482    | 9448    | 4043    | 1028    | 8092    | 8928    |
| gamma-glutamylfelynylglycine                 | 0.86 | 0.85 | 0.9  | 0.10565 | 0.25183 | 0.34960 | 0.40268 | 0.06012 | 0.18785 |
| gamma-glutamylalanine                        | 1    | 1.13 | 0.74 | 4593    | 499     | 4253    | 1864    | 7673    | 1722    |
| gamma-glutamylglutamate                      | 0.96 | 0.87 | 1.4  | 0.47817 | 0.53681 | 0.22000 | 0.34891 | 0.09318 | 0.20282 |
| gamma-glutamylglutamine                      | 0.94 | 0.95 | 1.12 | 7598    | 7714    | 7778    | 5076    | 0839    | 035     |
| gamma-glutamylglycine                        | 0.87 | 0.94 | 1.07 | 0.05905 | 0.18519 | 0.60984 | 0.49192 | 0.04172 | 0.17629 |
|                                              |      |      |      | 3409    | 4414    | 505     | 6624    | 8642    | 2683    |
|                                              |      |      |      | 0.07694 | 0.20746 | 0.91212 | 0.56658 | 0.04715 | 0.18266 |
|                                              |      |      |      | 1867    | 731     | 6017    | 172     | 5172    | 1208    |
|                                              |      |      |      | 0.57070 | 0.57875 | 0.81662 | 0.54297 | 0.01186 | 0.13541 |
|                                              |      |      |      | 2599    | 9744    | 4131    | 128     | 1967    | 4007    |
|                                              |      |      |      | 0.48695 | 0.53923 | 0.68678 | 0.51163 | 0.02499 | 0.15765 |
|                                              |      |      |      | 9546    | 6729    | 5453    | 0265    | 473     | 4649    |
|                                              |      |      |      | 0.08959 | 0.22875 | 0.03297 | 0.20430 | 0.06938 | 0.18874 |
|                                              |      |      |      | 5544    | 9272    | 7136    | 6918    | 9423    | 5601    |
|                                              |      |      |      | 0.05946 | 0.18546 | 0.03196 | 0.20430 | 0.59129 | 0.46962 |
|                                              |      |      |      | 066     | 3618    | 5397    | 6918    | 4051    | 0235    |
|                                              |      |      |      | 0.05982 | 0.18560 | 0.23558 | 0.35281 | 0.47434 | 0.42117 |
|                                              |      |      |      | 6468    | 1359    | 4037    | 5194    | 8729    | 6529    |
|                                              |      |      |      | 0.01256 | 0.09617 | 0.07081 | 0.23512 | 0.52031 | 0.43953 |
|                                              |      |      |      | 9597    | 228     | 9167    | 1437    | 2339    | 2946    |
|                                              |      |      |      | 0.02851 | 0.13162 | 0.74552 | 0.52568 | 0.18206 | 0.24824 |
|                                              |      |      |      | 2311    | 0382    | 1459    | 0595    | 7806    | 2476    |
|                                              |      |      |      | 0.01649 | 0.10577 | 0.25099 | 0.35573 | 0.08249 | 0.19805 |
|                                              |      |      |      | 806     | 6962    | 5595    | 5911    | 7561    | 4444    |
|                                              |      |      |      | 0.56084 | 0.57585 | 0.06573 | 0.23512 | 0.05190 | 0.18506 |
|                                              |      |      |      | 3007    | 8067    | 3923    | 1437    | 4036    | 7015    |
|                                              |      |      |      | 0.57050 | 0.57875 | 0.14007 | 0.29576 | 0.06697 | 0.18874 |
|                                              |      |      |      | 9264    | 9744    | 8399    | 4293    | 9144    | 5601    |
|                                              |      |      |      | 0.10798 | 0.25245 | 0.26948 | 0.36111 | 0.00391 | 0.11035 |
|                                              |      |      |      | 8882    | 0363    | 6436    | 0456    | 6991    | 0299    |
|                                              |      |      |      | 0.02822 | 0.13136 | 0.60695 | 0.49192 | 0.49610 | 0.43077 |
|                                              |      |      |      | 8349    | 0421    | 5581    | 6624    | 9395    | 0436    |



|                                           |      |      |      |                                                                             |
|-------------------------------------------|------|------|------|-----------------------------------------------------------------------------|
| gamma-glutamylhistidine                   | 0.91 | 1.02 | 1.13 | 0.017690.109790.617240.492940.241560.29194<br>5583 5027 764 256 8806 0619   |
| gamma-glutamylisoleucine                  | 0.85 | 1.02 | 1.05 | 0.039780.152320.908650.565150.647380.49463<br>0538 6081 4957 4847 868 6556  |
| gamma-glutamylleucine                     | 0.88 | 0.98 | 1.1  | 0.041320.154850.673020.505820.324890.34387<br>813 5191 1079 8125 3229 0965  |
| gamma-glutamyl-epsilon-lysine             | 0.76 | 0.9  | 1.19 | 0.001980.044430.216540.348910.027530.15765<br>0051 422 4716 5076 2793 4649  |
| gamma-glutamylmethionine                  | 1.08 | 1.15 | 1.47 | 0.479260.536990.076800.244920.009140.13469<br>6466 5375 5292 1099 0566 0715 |
| gamma-glutamylphenylalanine               | 0.92 | 0.95 | 1.13 | 0.057250.182540.478170.435200.032430.16246<br>9919 6239 1444 2513 7553 7472 |
| gamma-glutamylvaline                      | 0.87 | 1    | 1.09 | 0.070520.201450.743520.525680.382910.37746<br>2187 3648 5031 0595 307 5285  |
| gamma-glutamylserine                      | 0.98 | 1    | 1.29 | 0.355110.480180.809430.542720.095950.20282<br>8449 0799 2914 9304 7644 035  |
| gamma-glutamylcitrulline                  | 0.86 | 0.88 | 1.22 | 0.153000.304450.359640.404180.103050.20601<br>8457 1536 54 1603 2097 8928   |
| gamma-glutamyl-2-aminobutyrate            | 0.88 | 1.26 | 1.23 | 0.064520.192920.097680.257850.126310.21914<br>8216 7031 126 7023 3041 2586  |
| Leucylhydroxyproline                      | 1.68 | 1.27 | 1.52 | 0.002230.044430.012340.153810.072360.18874<br>3134 422 6677 5112 1165 5601  |
| felinylglycine                            | 0.87 | 0.97 | 0.83 | 0.031940.138130.899800.561820.023310.15765<br>571 8448 7096 9389 8156 4649  |
| isoleucylglycine                          | 1.33 | 1.12 | 1.93 | 0.049840.169520.469210.433550.073800.18874<br>6045 8728 3358 2866 0736 5601 |
| phenylacetylalanine                       | 2.08 | 1.06 | 1.52 | 0.026130.127360.477730.435200.169010.24358<br>998 1579 0689 2513 8975 9669  |
| phenylacetylglutamate                     | 1.69 | 1.18 | 2.17 | 0.033260.138620.150310.307920.007170.12793<br>0505 355 5814 5906 746 2774   |
| phenylacetylglutamine                     | 1.83 | 1.18 | 1.99 | 0.108390.252450.416450.425810.058840.18785<br>2238 0363 3106 1742 9876 1722 |
| 4-hydroxyphenylacetyl glycine             | 0.66 | 0.55 | 0.59 | 0.046400.164480.264200.358690.233100.28793<br>7894 9242 5739 8521 0674 6103 |
| phenylacetylserine                        | 2.02 | 1.26 | 2.12 | 0.051860.172010.259570.358690.036330.16246<br>9663 4441 3811 8521 8759 7472 |
| 1,5-anhydroglucitol (1,5-AG)              | 0.65 | 0.86 | 0.73 | 0.019370.110770.633150.497640.148070.22967<br>4568 2471 3562 4204 4806 4679 |
| ribonate                                  | 0.84 | 0.82 | 1.06 | 0.033060.138620.010660.142650.866480.58262<br>8478 355 8092 7194 5912 0204  |
| arabonate/xylonate                        | 0.88 | 0.8  | 1.12 | 0.053790.175370.259760.358690.034850.16246<br>3521 0861 0346 8521 5314 7472 |
| sedoheptulose                             | 0.84 | 0.85 | 1    | 0.034320.138620.211600.348910.966900.60388<br>9637 355 4818 5076 5508 0894  |
| glucuronate                               | 1.01 | 0.92 | 1.4  | 0.438950.527990.220660.348910.034850.16246<br>4521 6766 3996 5076 3609 7472 |
| N-acetylglucosaminylasparagine            | 0.85 | 0.89 | 1.51 | 0.011830.095650.095240.257850.128800.22026<br>971 178 0611 7023 9588 6201   |
| N-acetylglucosamine/N-acetylgalactosamine | 0.89 | 0.89 | 1.17 | 0.014780.100380.036400.204300.182200.24824<br>7458 6505 1097 6918 2973 2476 |
| citrate                                   | 0.93 | 0.93 | 1.09 | 0.071390.202240.249710.355730.044610.18235<br>3467 7188 9931 5911 504 731   |
| aconitate [cis or trans]                  | 0.88 | 0.88 | 1.08 | 0.002860.047610.049830.213130.175770.24426<br>8733 4135 3642 8329 7522 7837 |

|                                                   |      |      |      |                                                                             |
|---------------------------------------------------|------|------|------|-----------------------------------------------------------------------------|
| isocitrate                                        | 0.82 | 0.91 | 1.21 | 0.000590.034580.127440.283120.077730.19080<br>9429 9023 5676 0417 1126 3079 |
| succinylcarnitine (C4-DC)                         | 0.88 | 0.92 | 1.03 | 0.031270.136730.418150.425810.372690.37227<br>9568 7473 8037 1742 9166 1307 |
| fumarate                                          | 0.92 | 0.82 | 0.95 | 0.199690.362940.077360.244920.952880.60105<br>2456 3791 0186 1099 9486 1521 |
| malate                                            | 0.87 | 0.84 | 0.98 | 0.005140.063010.069250.235120.881060.58494<br>4715 1514 1866 1437 5396 1523 |
| 2-methylcitrate/homocitrate                       | 1.11 | 0.9  | 1.34 | 0.403050.513830.186370.332910.015050.14770<br>9327 1414 143 3203 0816 0418  |
| Malonylcarnitine                                  | 0.58 | 0.9  | 0.89 | 0.002100.044430.804340.542310.510260.43480<br>3211 422 734 9019 8853 452    |
| Malonate                                          | 0.85 | 1.51 | 1.2  | 0.013820.097570.818070.542970.207960.27016<br>3204 7835 7519 128 3788 1686  |
| caproate (6:0)                                    | 0.85 | 0.93 | 0.89 | 0.021460.120570.186710.332910.323550.34387<br>26 0985 7647 3203 8484 0965   |
| heptanoate (7:0)                                  | 0.75 | 0.84 | 0.91 | 0.003050.047610.097510.257850.576740.46319<br>163 4135 9575 7023 9851 1051  |
| caprylate (8:0)                                   | 0.8  | 0.91 | 0.9  | 0.043810.158820.359980.404180.562190.45831<br>1921 0276 6565 1603 8149 7397 |
| pelargonate (9:0)                                 | 0.84 | 0.89 | 0.87 | 0.071500.202240.115070.275070.592920.46997<br>0969 7188 3923 1601 0989 7996 |
| caprate (10:0)                                    | 0.85 | 0.89 | 1.01 | 0.015480.101560.058510.223880.881930.58494<br>921 5763 7691 2146 1095 1523  |
| undecanoate (11:0)                                | 0.87 | 0.89 | 0.94 | 0.042780.156960.131650.283120.673940.50977<br>5897 9701 3655 0417 9087 0766 |
| tetradecadienoate (14:2)                          | 0.74 | 0.92 | 0.94 | 0.013860.097570.090530.251300.912290.59370<br>6418 7835 3386 6182 6594 7969 |
| heptadecatrienoate (17:3)                         | 1.01 | 0.81 | 0.92 | 0.900480.681540.177260.331960.919940.59370<br>2562 1341 5694 2142 8115 7969 |
| stearidonate (18:4n3)                             | 0.95 | 0.84 | 0.99 | 0.496820.542960.051830.216980.721540.53382<br>863 6986 3586 1564 3681 1315  |
| (11 or 12)-methyltridecanoate<br>(a14:0 or i14:0) | 0.9  | 0.8  | 0.91 | 0.013480.097570.000310.021960.543130.44955<br>6856 7835 9368 3535 695 473   |
| branched-chain fatty acid 16:0                    | 1.06 | 0.82 | 1.05 | 0.464850.529760.079840.246390.879910.58494<br>6699 1636 5305 6311 1354 1523 |
| glutarate (C5-DC)                                 | 0.81 | 0.92 | 0.78 | 0.010490.094640.186380.332910.400070.38457<br>766 8395 6094 3203 2447 7574  |
| adipate (C6-DC)                                   | 0.87 | 0.89 | 0.82 | 0.101020.243900.086050.249170.380110.37617<br>2384 4854 1743 401 0164 7462  |
| Maleate                                           | 0.91 | 0.77 | 1.09 | 0.200320.362940.063210.232310.369070.36962<br>2157 3791 8526 78 6668 3756   |
| pimelate (C7-DC)                                  | 0.91 | 0.87 | 0.75 | 0.253970.407220.057270.223880.277670.31504<br>3835 9788 3328 2146 9088 8798 |
| suberate (C8-DC)                                  | 0.89 | 0.87 | 0.83 | 0.165970.322460.045410.204320.408230.38578<br>5448 912 4074 2457 2701 3066  |
| azelate (C9-DC)                                   | 0.88 | 0.9  | 0.84 | 0.116180.261290.091650.252110.456020.41530<br>0565 8366 0373 9017 1553 901  |
| sebacate (C10-DC)                                 | 0.84 | 0.86 | 0.82 | 0.051630.172010.034160.204300.482660.42571<br>8038 4441 9563 6918 7139 5907 |
| undecanedioate (C11-DC)                           | 0.84 | 0.87 | 0.83 | 0.074570.207460.066140.235120.474450.42117<br>0349 731 577 1437 693 6529    |
| tridecanedioate (C13-DC)                          | 0.84 | 0.85 | 0.86 | 0.063370.192180.057660.223880.554830.45467<br>2712 4883 033 2146 2724 0441  |

|                                       |      |      |      |                                                                             |
|---------------------------------------|------|------|------|-----------------------------------------------------------------------------|
| dodecanedioate (C12-DC)               | 0.83 | 0.86 | 0.83 | 0.042980.156960.067850.235120.486680.42615<br>0571 9701 4038 1437 5325 6545 |
| dodecadienoate (12:2)                 | 0.76 | 0.96 | 1    | 0.010420.094640.378230.408230.873520.58476<br>3048 8395 1099 3249 7568 811  |
| tridecanedioate (C13:1-DC)            | 0.77 | 0.88 | 1.01 | 0.025950.127360.171100.327350.450430.41173<br>2686 1579 9321 1976 7656 6153 |
| tetradecanedioate (C14-DC)            | 0.86 | 0.85 | 1.02 | 0.006300.068620.038690.204300.956850.60105<br>3563 9518 9438 6918 4209 1521 |
| branched chain 14:0 dicarboxylic acid | 0.95 | 0.95 | 1.65 | 0.448290.529760.574560.478290.030230.16246<br>5485 1636 1913 4057 4582 7472 |
| hexadecanedioate (C16-DC)             | 0.85 | 0.75 | 1.22 | 0.010390.094640.000190.015600.100740.20588<br>9806 8395 4518 6967 3488 6978 |
| hexadecenedioate (C16:1-DC)           | 0.96 | 0.83 | 1.38 | 0.816500.665060.016520.153810.001030.06744<br>0948 1193 4144 5112 6353 0674 |
| heptadecanedioate (C17-DC)            | 0.82 | 0.74 | 1.24 | 0.037300.146440.000950.057740.280470.31575<br>6982 4652 9551 1402 8161 6615 |
| octadecanedioate (C18-DC)             | 0.84 | 0.83 | 1.27 | 0.012040.095650.033350.204300.225480.28262<br>9186 178 2131 6918 2511 0342  |
| octadecenedioate (C18:1-DC)           | 0.85 | 0.73 | 1.24 | 0.143880.294650.008490.122470.304080.33115<br>6805 2872 0111 9891 7308 4014 |
| octadecadienedioate (C18:2-DC)        | 0.89 | 0.77 | 1.19 | 0.054600.177000.006470.107490.035330.16246<br>1434 4693 5259 0126 4427 7472 |
| nonadecanedioate (C19-DC)             | 0.79 | 0.88 | 1.32 | 0.001640.039770.245870.355500.233690.28796<br>8726 9476 4836 7058 5307 3094 |
| eicosanedioate (C20-DC)               | 0.84 | 0.89 | 1.36 | 0.004630.061660.261180.358690.153660.23324<br>6249 0247 482 8521 0746 7518  |
| docosadioate (C22-DC)                 | 0.83 | 0.75 | 1.35 | 0.000360.023660.016280.153810.304310.33115<br>9097 4592 4086 5112 6147 4014 |
| 2-aminoheptanoate                     | 0.88 | 0.82 | 1.12 | 0.075230.207460.060080.227730.214360.27423<br>0555 731 0082 8371 8958 0875  |
| 2-aminooctanoate                      | 0.9  | 0.81 | 1.09 | 0.272110.419840.007870.118490.358110.36297<br>6412 0051 6433 1992 072 9959  |
| butyrylcarnitine (C4)                 | 0.96 | 1.05 | 1.8  | 0.777430.656810.549590.471620.070690.18874<br>353 5353 9806 3059 725 5601   |
| Butyrylglycine                        | 0.66 | 0.66 | 0.79 | 0.003050.047610.003950.086580.077260.19080<br>3071 4135 6983 6656 7719 3079 |
| propionylcarnitine (C3)               | 0.86 | 0.95 | 1.19 | 0.248910.404620.624200.492940.411780.38768<br>7242 5746 1484 256 9218 6534  |
| Propionylglycine                      | 0.63 | 0.65 | 0.9  | 0.049930.169520.036550.204300.675300.50977<br>1454 8728 4827 6918 8402 0766 |
| methylmalonate (MMA)                  | 0.9  | 0.9  | 1.07 | 0.074380.207460.228260.352180.141110.22450<br>6453 731 9526 1402 1774 3528  |
| 2-methylmalonylcarnitine (C4-DC)      | 0.84 | 0.74 | 0.91 | 0.310400.447780.016610.153810.639890.49039<br>6278 6748 4716 5112 1433 8867 |
| Hexanoylglycine                       | 0.53 | 0.67 | 0.66 | 0.001110.036730.097890.257850.135670.22345<br>2598 4416 3193 7023 8374 5259 |
| 3,4-methylene heptanoylglycine        | 0.76 | 0.7  | 0.55 | 0.009160.089670.267360.359520.059200.18785<br>9267 747 4611 6008 3155 1722  |
| N-octanoylglycine                     | 0.54 | 0.65 | 0.92 | 0.012100.095650.151610.307970.391000.37948<br>0831 178 9971 643 2219 6617   |
| N-linoleoylglycine                    | 1.25 | 0.96 | 0.69 | 0.315830.449990.964300.579730.060360.18785<br>2963 0312 5447 6878 347 1722  |
| acetylcarnitine (C2)                  | 0.86 | 1.08 | 1.38 | 0.067860.198230.145060.300040.131820.22239<br>0033 1369 6552 0232 4161 5377 |



|                                           |      |      |      |                                                                             |
|-------------------------------------------|------|------|------|-----------------------------------------------------------------------------|
| octanoylcarnitine (C8)                    | 0.9  | 0.91 | 1.3  | 0.226570.389100.088480.251300.259910.30539<br>3184 7823 2736 6182 7579 9567 |
| decanoylcarnitine (C10)                   | 0.93 | 0.93 | 1.69 | 0.365550.488990.313700.382090.096450.20282<br>6495 7465 4168 1342 4951 035  |
| laurylcarnitine (C12)                     | 0.94 | 1    | 1.72 | 0.236320.395580.964610.579730.096170.20282<br>9423 7774 5034 6878 6002 035  |
| myristoylcarnitine (C14)                  | 0.86 | 0.89 | 1.47 | 0.068020.198230.169650.326690.132550.22287<br>0759 1369 6692 3432 0183 2326 |
| pentadecanoylcarnitine (C15)              | 0.92 | 0.87 | 1.49 | 0.416030.521360.105390.265070.074870.18874<br>8453 3947 397 6514 908 5601   |
| palmitoylcarnitine (C16)                  | 0.89 | 0.96 | 1.39 | 0.089550.228750.484550.435200.098340.20282<br>3321 9272 9115 2513 3827 035  |
| arachidoylcarnitine (C20)                 | 0.91 | 0.88 | 1.17 | 0.041700.155240.116850.277110.268320.31192<br>0804 3512 3811 2592 5717 6388 |
| behenoylcarnitine (C22)                   | 0.76 | 0.88 | 1.19 | 0.031010.136610.365580.404180.166260.24358<br>5681 8894 8115 1603 4006 9669 |
| lignoceroylcarnitine (C24)                | 0.81 | 0.82 | 0.89 | 0.002150.044430.019340.166330.054090.18647<br>4803 422 9568 8451 2452 039   |
| cerotoylcarnitine (C26)                   | 0.62 | 0.8  | 0.91 | 0.001350.037270.103850.265070.567510.45971<br>6512 3914 2941 6514 4599 9939 |
| butenoylcarnitine (C4:1)                  | 0.94 | 0.96 | 0.87 | 0.454850.529760.815100.542720.508770.43480<br>2971 1636 2361 9304 3852 452  |
| undecenoylcarnitine (C11:1)               | 1.01 | 0.88 | 1.36 | 0.578560.581620.011660.151810.027590.15765<br>7513 4756 8402 6533 0065 4649 |
| palmitoleoylcarnitine (C16:1)             | 0.94 | 0.94 | 1.42 | 0.236950.395580.203430.343620.092880.20282<br>0322 7774 0135 1116 886 035   |
| oleoylcarnitine (C18:1)                   | 0.85 | 0.94 | 1.36 | 0.026150.127360.281660.368900.137340.22345<br>4182 1579 2475 9448 1586 5259 |
| eicosenoylcarnitine (C20:1)               | 0.88 | 0.94 | 1.32 | 0.019380.110770.265250.358690.177540.24454<br>8869 2471 9024 8521 0771 1312 |
| erucoylcarnitine (C22:1)                  | 0.88 | 0.82 | 1.13 | 0.122710.267200.036950.204300.467160.42117<br>2614 4683 4642 6918 3895 6529 |
| nervonoylcarnitine (C24:1)                | 0.75 | 0.82 | 1.29 | 0.004220.060960.018200.162270.176850.24426<br>6409 9448 2545 356 6354 7837  |
| ximenoylcarnitine (C26:1)                 | 0.61 | 0.72 | 0.76 | 0.000140.011690.002040.066390.107430.20601<br>1883 5858 2223 0469 2421 8928 |
| linoleoylcarnitine (C18:2)                | 0.83 | 0.91 | 1.42 | 0.024710.127360.235360.352810.091850.20282<br>6161 1579 4696 5194 847 035   |
| linolenoylcarnitine (C18:3)               | 0.81 | 0.85 | 1.67 | 0.034450.138620.118880.278350.252920.30289<br>051 355 4939 0496 8723 3355   |
| dihomo-linoleoylcarnitine (C20:2)         | 0.83 | 0.9  | 1.36 | 0.025660.127360.151240.307970.095190.20282<br>858 1579 7784 643 7848 035    |
| arachidonoylcarnitine (C20:4)             | 0.87 | 0.9  | 1.57 | 0.136370.286670.172850.327350.071480.18874<br>6196 1813 6335 1976 8055 5601 |
| dihomo-linolenoylcarnitine (C20:3n3 or 6) | 0.77 | 0.9  | 1.52 | 0.026670.127360.299420.377330.027480.15765<br>3313 1579 0677 5653 0662 4649 |
| adrenoylcarnitine (C22:4)                 | 0.72 | 0.78 | 1.3  | 0.013380.097570.019090.166330.280740.31575<br>1633 7835 9664 8451 5613 6615 |
| docosapentaenoylcarnitine (C22:5n3)       | 0.94 | 0.96 | 1.58 | 0.457110.529760.434860.426540.010440.13539<br>6806 1636 7034 8407 3828 9681 |
| docosahexaenoylcarnitine (C22:6)          | 0.87 | 0.93 | 1.44 | 0.118450.263910.214820.348910.000840.06744<br>8478 6849 8997 5076 9103 0674 |
| adipoylcarnitine (C6-DC)                  | 0.81 | 0.8  | 1.05 | 0.004660.061660.040280.204300.541070.44888<br>9152 0247 802 6918 3564 0452  |

|                                     |      |      |      |                                                                    |
|-------------------------------------|------|------|------|--------------------------------------------------------------------|
| suberoylcarnitine (C8-DC)           | 0.69 | 0.68 | 0.52 | 0.004860.062400.189930.336150.093790.2028263941572230748316602035  |
| octadecenedioylcarnitine (C18:1-DC) | 0.87 | 0.87 | 1.37 | 0.456410.529760.186090.332910.087640.20121509516360388320399952418 |
| (R)-3-hydroxybutyrylcarnitine       | 0.38 | 1.03 | 1.68 | 0.012660.096170.395440.420230.128740.2202666792284189905727856201  |
| (S)-3-hydroxybutyrylcarnitine       | 0.75 | 0.98 | 1.15 | 0.088130.227430.492900.440230.826610.571630535258072047648241011   |
| 3-hydroxyoleoylcarnitine            | 0.81 | 0.89 | 1.23 | 0.002870.047610.070440.235120.435150.40214827441356038143706259668 |
| Deoxycarnitine                      | 0.99 | 1.09 | 1.47 | 0.764540.654570.450630.428920.059610.18785646230222964510421221722 |
| Carnitine                           | 1.04 | 1.13 | 1.39 | 0.571780.578840.075770.244920.047500.182669709497383109914021208   |
| 3-hydroxybutyrate (BHBA)            | 0.78 | 1    | 1.1  | 0.026110.127360.930530.569210.660230.50216799915794095460382774771 |
| palmitoylcholine                    | 0.88 | 1.12 | 1.3  | 0.537140.564330.837800.549400.059770.1878589131903904197019791722  |
| Oleoylcholine                       | 0.92 | 1.14 | 1.33 | 0.624370.604880.848810.549400.077150.190809038756351970166593079   |
| Stearoylcholine                     | 0.95 | 1.18 | 1.35 | 0.707900.632540.717370.516980.050750.1850676084222298454154467015  |
| docosa-hexaenoylcholine             | 0.9  | 1.29 | 1.52 | 0.485320.539230.375590.406650.025110.1576549867296981961563474649  |
| Arachidonoylcholine                 | 0.98 | 1.21 | 1.44 | 0.787330.660460.575250.478290.035420.16246263401679939405721417472 |
| alpha-hydroxycaproate               | 0.89 | 0.75 | 1.04 | 0.424220.522020.083180.247200.708090.52757835297687747301757568826 |
| 2-hydroxyheptanoate                 | 0.87 | 0.9  | 0.83 | 0.136620.286670.471840.435140.037850.16585084118134799909782147635 |
| 2-hydroxyoctanoate                  | 0.72 | 0.87 | 1.13 | 0.008940.088950.001540.066390.289240.32171121547768229046954927856 |
| 2-hydroxydecanoate                  | 0.85 | 0.77 | 1.17 | 0.047130.165110.028570.201000.308770.33333131804468541916665613728 |
| 2-hydroxylaurate                    | 0.83 | 0.85 | 1.07 | 0.006890.071010.006230.107140.839050.57640223386851623022625247059 |
| 2-hydroxymyristate                  | 1.1  | 0.77 | 0.85 | 0.682360.625980.036930.204300.472510.42117424884940672691829646529 |
| 3-hydroxyhexanoate                  | 0.82 | 1.04 | 1    | 0.040120.152320.956510.578970.945850.60105519260813808571223391521 |
| 3-hydroxyoctanoate                  | 0.75 | 1.11 | 0.86 | 0.011000.095580.763870.529870.733650.54003538937997654539493483566 |
| 3-hydroxydecanoate                  | 0.78 | 1    | 0.99 | 0.002780.047610.608980.491920.809560.56558376541356276662492655765 |
| 3-hydroxysebacate                   | 0.76 | 0.89 | 1    | 0.012890.096660.222420.348910.911150.59370861514012835507642247969 |
| 3-hydroxylaurate                    | 0.79 | 0.96 | 0.94 | 0.032070.138130.273040.361110.776010.5528688398448361804565098188  |
| 3-hydroxymyristate                  | 0.85 | 0.92 | 1.09 | 0.095600.236770.171540.327350.521880.4395367636722969197645462946  |
| 8-hydroxyoctanoate                  | 0.88 | 0.85 | 0.81 | 0.156320.307860.035300.204300.353370.3609259227688542669180236854  |
| 16-hydroxypalmitate                 | 0.85 | 0.85 | 1.12 | 0.001340.037270.087540.250850.407860.38578760239144751932507723066 |

|                                              |      |      |      |                                                                             |
|----------------------------------------------|------|------|------|-----------------------------------------------------------------------------|
| 13-HODE + 9-HODE                             | 0.82 | 0.77 | 1.09 | 0.122450.267200.009160.125990.609900.47910<br>1405 4683 044 6273 4233 2764  |
| hydroxy-undecanedioate (OH-C11:0-DC)         | 0.85 | 0.93 | 0.86 | 0.095110.236570.313930.382090.516070.43775<br>8291 9324 4358 1342 4281 1815 |
| 9,10-DiHOME                                  | 0.92 | 0.82 | 1.11 | 0.679020.625980.062750.232310.397930.38325<br>9522 8494 9596 78 2594 3396   |
| 2S,3R-dihydroxybutyrate                      | 0.9  | 1    | 0.97 | 0.093430.235240.973720.580810.995060.61306<br>1313 3938 6105 652 7307 8922  |
| Azelaoyltaurine                              | 0.81 | 0.77 | 1.24 | 0.032780.138620.030330.204300.083910.19805<br>7174 355 7195 6918 0671 4444  |
| Hexanoyltaurine                              | 0.75 | 0.83 | 1.14 | 0.005350.063010.069930.235120.166690.24358<br>0757 1514 8509 1437 0376 9669 |
| myo-inositol                                 | 1.38 | 0.97 | 1.35 | 0.018260.110020.991630.587170.468930.42117<br>2408 535 2218 7628 9737 6529  |
| choline phosphate                            | 0.98 | 1.01 | 1.19 | 0.679620.625980.725230.519110.073790.18874<br>6961 8494 5634 7628 6119 5601 |
| glycerophosphorylcholine (GPC)               | 0.97 | 0.95 | 1.16 | 0.742180.644010.590950.484450.003660.11035<br>9107 1559 5643 4247 7854 0299 |
| Glycerophosphoethanolamine                   | 0.92 | 0.9  | 1.06 | 0.040050.152320.119110.278350.016740.14770<br>0553 6081 0433 0496 5942 0418 |
| 1-myristoyl-2-palmitoyl-GPC (14:0/16:0)      | 0.96 | 0.96 | 1.21 | 0.839420.667460.300880.378190.081620.19730<br>6516 9362 8769 573 9999 2894  |
| 1-myristoyl-2-arachidonoyl-GPC (14:0/20:4)   | 1.01 | 0.88 | 1.68 | 0.627670.604880.079290.246270.042800.17785<br>4996 75 5761 9175 5635 3564   |
| 1,2-dipalmitoyl-GPC (16:0/16:0)              | 1.01 | 0.94 | 1.11 | 0.562710.575850.145210.300040.016670.14770<br>0461 8067 9854 0232 2231 0418 |
| 1-palmitoyl-2-palmitoleoyl-GPC (16:0/16:1)   | 0.98 | 0.91 | 1.27 | 0.820440.665060.013770.153810.020190.14932<br>2099 1193 5891 5112 7752 7958 |
| 1-palmitoyl-2-stearoyl-GPC (16:0/18:0)       | 1.07 | 0.92 | 1.17 | 0.068360.198230.115420.275070.091790.20282<br>3569 1369 1764 1601 0917 035  |
| 1-palmitoyl-2-oleoyl-GPC (16:0/18:1)         | 0.95 | 0.93 | 1.15 | 0.181750.340540.028810.201000.073090.18874<br>0528 7669 0814 9166 4458 5601 |
| 1-palmitoyl-2-linoleoyl-GPC (16:0/18:2)      | 0.96 | 0.94 | 1.05 | 0.027270.127970.039530.204300.243520.29289<br>9975 9256 0621 6918 6799 8724 |
| 1-palmitoyl-2-arachidonoyl-GPC (16:0/20:4n6) | 0.98 | 0.98 | 1.2  | 0.814310.665060.601730.490140.049270.18462<br>6151 1193 0479 4289 3257 9535 |
| 1-palmitoleoyl-2-linoleoyl-GPC (16:1/18:2)   | 0.98 | 0.9  | 1.28 | 0.930450.684820.023890.185950.034590.16246<br>2924 4161 6959 5146 8987 7472 |
| 1-palmitoleoyl-2-linolenoyl-GPC (16:1/18:3)  | 1.06 | 0.88 | 1.55 | 0.469550.533350.036590.204300.019980.14932<br>0514 8647 7042 6918 2069 7958 |
| 1-stearoyl-2-oleoyl-GPC (18:0/18:1)          | 1.02 | 0.95 | 1.19 | 0.453110.529760.262180.358690.033400.16246<br>1603 1636 8217 8521 0916 7472 |
| 1-stearoyl-2-linoleoyl-GPC (18:0/18:2)       | 1.01 | 0.96 | 1.06 | 0.488420.539230.272860.361110.058450.18785<br>2007 6729 8421 0456 9601 1722 |
| 1-stearoyl-2-arachidonoyl-GPC (18:0/20:4)    | 1.05 | 1.01 | 1.15 | 0.049590.169520.864460.553980.034610.16246<br>1122 8728 6801 5264 0157 7472 |
| 1-stearoyl-2-docosahexaenoyl-GPC (18:0/22:6) | 1.02 | 1.03 | 1.2  | 0.457570.529760.716620.516980.096650.20282<br>2935 1636 166 4541 4019 035   |
| 1-oleoyl-2-linoleoyl-GPC (18:1/18:2)         | 1.03 | 0.96 | 1.1  | 0.172960.331570.289720.369950.051210.18506<br>1252 5976 4819 9145 6764 7015 |
| 1-oleoyl-2-docosahexaenoyl-GPC (18:1/22:6)   | 1.13 | 1.11 | 1.33 | 0.018890.110700.308120.382090.028720.15852<br>1396 8667 5707 1342 1895 2177 |
| 1,2-dilinoleoyl-GPC (18:2/18:2)              | 1.01 | 0.91 | 1.21 | 0.528620.559460.090390.251300.040250.17296<br>0833 3841 1307 6182 3177 6222 |

|                                                    |      |      |      |                                                                             |
|----------------------------------------------------|------|------|------|-----------------------------------------------------------------------------|
| 1-linoleoyl-2-linolenoyl-GPC (18:2/18:3)           | 1.04 | 0.89 | 1.44 | 0.491000.540690.025410.189430.036510.16246<br>2244 5708 0905 245 7233 7472  |
| 1-linoleoyl-2-arachidonoyl-GPC (18:2/20:4n6)       | 1.12 | 0.98 | 1.4  | 0.101830.244830.634980.497850.035260.16246<br>1383 3664 0393 3267 3769 7472 |
| 1,2-dilinolenoyl-GPC (18:3/18:3)                   | 1.07 | 0.77 | 2.62 | 0.461850.529760.013140.153810.105900.20601<br>6501 1636 2326 5112 363 8928  |
| 1-palmitoyl-2-arachidonoyl-GPE (16:0/20:4)         | 0.86 | 0.71 | 1.08 | 0.213800.371590.072060.235990.522810.43953<br>0305 5946 3864 8708 2083 2946 |
| 1-palmitoyl-2-docosahexaenoyl-GPE (16:0/22:6)      | 0.92 | 0.77 | 1.34 | 0.318040.451590.339320.396740.069670.18874<br>7489 1034 8603 2525 7531 5601 |
| 1-stearoyl-2-oleoyl-GPE (18:0/18:1)                | 1.18 | 0.82 | 1.7  | 0.164240.320170.045010.204320.016620.14770<br>0637 664 6293 2457 2983 0418  |
| 1-stearoyl-2-linoleoyl-GPE (18:0/18:2)             | 0.97 | 0.77 | 1.3  | 0.710160.632540.061800.230640.034210.16246<br>2714 422 6099 8714 2298 7472  |
| 1-stearoyl-2-arachidonoyl-GPE (18:0/20:4)          | 0.96 | 0.69 | 1.21 | 0.421010.522020.005740.102360.063120.18874<br>4169 9768 1126 2942 0977 5601 |
| 1-stearoyl-2-docosahexaenoyl-GPE (18:0/22:6)       | 1.01 | 0.78 | 1.23 | 0.649080.618060.030830.204300.012120.13541<br>8605 2071 9836 6918 0739 4007 |
| 1-palmitoyl-2-linoleoyl-GPI (16:0/18:2)            | 0.97 | 0.87 | 0.71 | 0.383330.499140.016540.153810.106570.20601<br>1326 771 6384 5112 9258 8928  |
| 1-palmitoyl-2-arachidonoyl-GPI (16:0/20:4)         | 0.82 | 0.85 | 1.21 | 0.021590.120570.186560.332910.069000.18874<br>0722 0985 2208 3203 2179 5601 |
| 1-stearoyl-2-arachidonoyl-GPI (18:0/20:4)          | 0.97 | 0.94 | 1.22 | 0.653440.620160.421300.425810.046030.18266<br>2558 0317 405 1742 4216 1208  |
| 1-palmitoyl-GPA (16:0)                             | 0.67 | 0.87 | 1.35 | 0.061860.189890.565750.477090.204570.26756<br>7292 0828 398 9929 7795 1383  |
| 1-linoleoyl-GPA (18:2)                             | 0.67 | 0.78 | 0.87 | 4.6544E0.004470.113620.274860.075080.18874<br>-05 6239 1475 3304 6149 5601  |
| 1-palmitoleoyl-GPC (16:1)                          | 0.97 | 0.88 | 1.4  | 0.903650.681540.103780.265070.051510.18506<br>968 1341 1257 6514 4701 7015  |
| 1-stearoyl-GPC (18:0)                              | 1.02 | 0.97 | 1.23 | 0.560700.575850.534940.465680.064630.18874<br>9312 8067 3966 5354 3175 5601 |
| 1-oleoyl-GPC (18:1)                                | 1.03 | 0.94 | 1.39 | 0.452480.529760.313040.382090.023060.15765<br>8019 1636 0751 1342 8279 4649 |
| 1-linoleoyl-GPC (18:2)                             | 1.02 | 0.96 | 1.38 | 0.671610.625980.368430.404180.006650.12793<br>6344 8494 7121 1603 2064 2774 |
| 1-linolenoyl-GPC (18:3)                            | 1.05 | 0.88 | 1.49 | 0.538670.564330.090760.251300.030880.16246<br>4567 1903 2625 6182 8253 7472 |
| 1-arachidonoyl-GPC (20:4n6)                        | 1.09 | 1.07 | 1.65 | 0.286070.429880.516000.457470.008890.13469<br>4065 0746 9475 4893 9896 0715 |
| 1-palmitoyl-GPE (16:0)                             | 0.9  | 0.84 | 1.26 | 0.116370.261290.001680.066390.110210.20601<br>7517 8366 8895 0469 3375 8928 |
| 1-stearoyl-GPE (18:0)                              | 0.91 | 0.86 | 1.4  | 0.222180.383850.003810.086580.064460.18874<br>3121 3344 8577 6656 3754 5601 |
| 1-oleoyl-GPE (18:1)                                | 1.14 | 0.97 | 1.63 | 0.109180.252450.299060.377330.002880.11035<br>689 0363 3733 5653 9141 0299  |
| 1-linoleoyl-GPE (18:2)                             | 1.05 | 0.92 | 1.43 | 0.421490.522020.245230.355500.006390.12793<br>6161 9768 1772 7058 0793 2774 |
| 1-arachidonoyl-GPE (20:4n6)                        | 0.96 | 0.83 | 1.41 | 0.724990.637720.001280.066390.025040.15765<br>8222 5575 323 0469 9743 4649  |
| 1-(1-enyl-palmitoyl)-2-oleoyl-GPE (P-16:0/18:1)    | 1.06 | 0.89 | 1.13 | 0.169180.327340.023050.185950.359970.36413<br>3154 9933 9923 5146 3894 4325 |
| 1-(1-enyl-palmitoyl)-2-palmitoyl-GPC (P-16:0/16:0) | 0.93 | 0.89 | 1.36 | 0.143900.294650.052800.217260.070570.18874<br>1043 2872 2772 0251 3125 5601 |



|                                                      |      |      |      |                                                                         |
|------------------------------------------------------|------|------|------|-------------------------------------------------------------------------|
| 1-(1-enyl-stearoyl)-2-oleoyl-GPE (P-18:0/18:1)       | 0.95 | 0.76 | 1.13 | 0.784640.660010.002480.066390.188470.254038869 2209 2383 0469 6357 5873 |
| 1-(1-enyl-stearoyl)-2-linoleoyl-GPE (P-18:0/18:2)    | 0.98 | 0.81 | 1.12 | 0.935490.686780.022920.185950.176300.244266571 4343 068 5146 944 7837   |
| 1-(1-enyl-palmitoyl)-2-linoleoyl-GPC (P-16:0/18:2)   | 0.94 | 0.9  | 1.21 | 0.247410.404440.042960.204300.093520.20282706 1459 5123 6918 4163 035   |
| 1-(1-enyl-stearoyl)-2-arachidonoyl-GPE (P-18:0/20:4) | 1.01 | 0.96 | 1.32 | 0.795750.663030.479580.435200.087130.200938861 4033 6873 2513 1071 8688 |
| 1-(1-enyl-palmitoyl)-GPC (P-16:0)                    | 1    | 0.93 | 1.4  | 0.770130.655440.238920.352810.067510.188746511 8768 1626 5194 232 5601  |
| 1-(1-enyl-palmitoyl)-GPE (P-16:0)                    | 0.98 | 0.95 | 1.31 | 0.802650.663190.460220.431670.093280.202822969 2571 315 8512 8096 035   |
| 1-(1-enyl-oleoyl)-GPE (P-18:1)                       | 0.84 | 0.88 | 1.37 | 0.731050.639310.297900.377330.085310.198828442 6219 9415 5653 5895 7981 |
| 1-(1-enyl-stearoyl)-GPE (P-18:0)                     | 1    | 0.92 | 1.3  | 0.591210.587040.306970.381860.053750.186476762 5929 7992 1341 1411 039  |
| glycerol 3-phosphate                                 | 0.91 | 0.86 | 1.12 | 0.022560.120570.068820.235120.442930.407096584 0985 1716 1437 486 8533  |
| palmitoleoyl-linoleoyl-glycerol (16:1/18:2)          | 0.96 | 0.57 | 1.68 | 0.900480.681540.007830.118490.116860.211026222 1341 255 1992 119 3415   |
| oleoyl-linoleoyl-glycerol (18:1/18:2)                | 0.89 | 0.66 | 1.65 | 0.260170.414720.016170.153810.070240.188748078 7527 7623 5112 1906 5601 |
| oleoyl-linoleoyl-glycerol (18:1/18:2)                | 0.93 | 0.63 | 1.52 | 0.577860.581620.004700.094440.288620.321711619 4756 861 7584 9514 7856  |
| linoleoyl-linoleoyl-glycerol (18:2/18:2)             | 0.8  | 0.68 | 1.65 | 0.047210.165110.049270.213130.078040.190802583 0446 4186 8329 9137 3079 |
| oleoyl-arachidonoyl-glycerol (18:1/20:4)             | 0.83 | 0.76 | 1.9  | 0.077940.209190.159520.318000.708340.527575681 6458 7122 8092 3851 8826 |
| oleoyl-arachidonoyl-glycerol (18:1/20:4)             | 0.85 | 0.81 | 1.95 | 0.296490.439810.082690.247200.448020.410274396 2551 6801 3017 0439 2573 |
| linoleoyl-arachidonoyl-glycerol (18:2/20:4)          | 0.85 | 0.88 | 1.74 | 0.108840.252450.467050.433220.047050.182668577 0363 6248 2741 8386 1208 |
| Sphinganine                                          | 1    | 1.1  | 1.16 | 0.978770.698980.040910.204300.253050.302891956 9881 3916 6918 5026 3355 |
| N-palmitoyl-sphinganine (d18:0/16:0)                 | 1.2  | 0.91 | 1.73 | 0.053770.175370.261110.358690.009640.134690054 0861 9902 8521 4798 0715 |
| N-palmitoyl-sphingosine (d18:1/16:0)                 | 0.89 | 0.88 | 1.57 | 0.462880.529760.172130.327350.031150.162465233 1636 1322 1976 1135 7472 |
| N-palmitoyl-phytosphingosine (t18:0/16:0)            | 0.91 | 0.93 | 1.89 | 0.657740.620160.386400.412450.024200.15765062 0317 5321 4431 3835 4649  |
| N-stearoyl-sphingosine (d18:1/18:0)                  | 0.96 | 0.93 | 1.45 | 0.667400.625980.313110.382090.023410.15765909 8494 2332 1342 7633 4649  |
| N-palmitoyl-heptadecasphingosine (d17:1/16:0)        | 0.9  | 0.73 | 2.04 | 0.925500.682920.076140.244920.024680.157653461 3451 0082 1099 0413 4649 |
| ceramide (d18:1/17:0, d17:1/18:0)                    | 0.9  | 0.74 | 2.17 | 0.847510.667630.284310.368920.034690.162465392 0561 475 2293 5739 7472  |
| ceramide (d18:1/20:0, d16:1/22:0, d20:1/18:0)        | 0.98 | 0.9  | 1.51 | 0.997520.705510.188780.335350.002500.106709358 1689 4244 5838 4733 8392 |
| ceramide (d18:2/24:1, d18:1/24:2)                    | 0.94 | 0.87 | 1.72 | 0.455390.529760.195600.342290.038510.166939193 1636 4654 5303 8537 9378 |
| glycosyl-N-palmitoyl-sphingosine (d18:1/16:0)        | 0.97 | 0.88 | 1.32 | 0.827700.665060.060860.228910.065460.188748615 1193 5888 4557 7106 5601 |
| glycosyl-N-stearoyl-sphingosine (d18:1/18:0)         | 0.95 | 0.88 | 1.37 | 0.627010.604880.050100.213130.126050.219146734 75 9085 8329 8836 2586   |



|                                                    |      |      |      |                                                                             |
|----------------------------------------------------|------|------|------|-----------------------------------------------------------------------------|
| glycosyl ceramide (d18:1/20:0, d16:1/22:0)         | 0.95 | 0.89 | 1.33 | 0.578280.581620.025570.189430.170770.24358<br>5419 4756 7513 245 3679 9669  |
| glycosyl ceramide (d18:2/24:1, d18:1/24:2)         | 0.98 | 0.93 | 1.49 | 0.733080.639310.250950.355730.067450.18874<br>9515 6219 6326 5911 9305 5601 |
| myristoyl dihydrosphingomyelin (d18:0/14:0)        | 1.14 | 1.03 | 1.54 | 0.080880.214090.929630.569210.035950.16246<br>2379 0873 6214 4603 2499 7472 |
| palmitoyl dihydrosphingomyelin (d18:0/16:0)        | 1.13 | 0.98 | 1.27 | 0.018300.110020.456360.431610.057250.18785<br>4727 535 3078 4187 5352 1722  |
| behenoyl dihydrosphingomyelin (d18:0/22:0)         | 1.03 | 0.94 | 1.35 | 0.301860.443220.223500.349330.085590.19882<br>9456 8168 618 9937 9838 7981  |
| sphingomyelin (d18:0/18:0, d19:0/17:0)             | 1.1  | 0.94 | 1.38 | 0.196300.359600.212070.348910.097940.20282<br>6282 3885 2199 5076 7326 035  |
| sphingomyelin (d18:0/20:0, d16:0/22:0)             | 1.07 | 0.89 | 1.41 | 0.210330.370020.044410.204300.068770.18874<br>2585 7028 0057 6918 8277 5601 |
| sphingomyelin (d17:1/14:0, d16:1/15:0)             | 1    | 0.94 | 1.51 | 0.438750.527990.349640.402680.037930.16585<br>4124 6766 6298 1864 9037 7635 |
| sphingomyelin (d18:1/14:0, d16:1/16:0)             | 1.01 | 0.95 | 1.3  | 0.604750.594480.364710.404180.094930.20282<br>1393 3094 0491 1603 9192 035  |
| sphingomyelin (d18:2/14:0, d18:1/14:1)             | 1.09 | 0.98 | 1.52 | 0.149180.300030.539710.467590.089190.20282<br>8836 244 3528 0689 4022 035   |
| sphingomyelin (d17:1/16:0, d18:1/15:0, d16:1/17:0) | 0.96 | 0.91 | 1.33 | 0.943670.689710.234270.352810.090870.20282<br>2267 725 6313 5194 638 035    |
| sphingomyelin (d17:2/16:0, d18:2/15:0)             | 0.98 | 0.9  | 1.5  | 0.537380.564330.235760.352810.047590.18266<br>2431 1903 7234 5194 6018 1208 |
| sphingomyelin (d18:1/20:0, d16:1/22:0)             | 1    | 0.91 | 1.22 | 0.781790.658570.083030.247200.105490.20601<br>8907 4968 3354 3017 6161 8928 |
| sphingomyelin (d18:1/20:1, d18:2/20:0)             | 1.01 | 0.97 | 1.2  | 0.706220.632540.422110.425810.073280.18874<br>7629 422 8686 1742 0346 5601  |
| sphingomyelin (d18:1/21:0, d17:1/22:0, d16:1/23:0) | 0.92 | 0.93 | 1.34 | 0.473860.536140.315090.382090.078180.19080<br>4625 819 9915 1342 1788 3079  |
| sphingomyelin (d18:2/21:0, d16:2/23:0)             | 0.94 | 0.93 | 1.4  | 0.710330.632540.483130.435200.093290.20282<br>8192 422 6691 2513 5511 035   |
| sphingomyelin (d18:1/22:1, d18:2/22:0, d16:1/24:1) | 1.02 | 0.91 | 1.28 | 0.525410.557310.081720.247200.109420.20601<br>2226 6635 2216 3017 3829 8928 |
| sphingomyelin (d18:1/22:2, d18:2/22:1, d16:1/24:2) | 0.98 | 0.92 | 1.24 | 0.800280.663190.058490.223880.170140.24358<br>2841 2571 9779 2146 9309 9669 |
| sphingomyelin (d18:2/23:0, d18:1/23:1, d17:1/24:1) | 0.93 | 0.93 | 1.37 | 0.552440.572310.288260.369070.083270.19805<br>7826 721 4179 298 3807 4444   |
| sphingomyelin (d18:1/24:1, d18:2/24:0)             | 1.03 | 0.92 | 1.3  | 0.495230.542250.098020.257850.109380.20601<br>7552 515 134 7023 297 8928    |
| sphingomyelin (d18:2/24:1, d18:1/24:2)             | 1.01 | 0.91 | 1.28 | 0.587340.586080.052410.217260.124010.21802<br>1406 7964 6664 0251 0852 6177 |
| sphingosine 1-phosphate                            | 1.02 | 1.04 | 1.42 | 0.717280.635430.775000.533090.019060.14932<br>3583 2938 2151 6551 575 7958  |
| 3-hydroxy-3-methylglutarate                        | 0.92 | 0.93 | 1.13 | 0.011830.095650.225040.349470.148720.22967<br>5123 178 7124 9085 5489 4679  |
| Cholesterol                                        | 1.01 | 0.93 | 1.34 | 0.905530.681540.251110.355730.015600.14770<br>5913 1341 4631 5911 0637 0418 |
| beta-sitosterol                                    | 0.96 | 0.77 | 1.37 | 0.643540.615800.005380.102360.066530.18874<br>3714 0262 7656 2942 482 5601  |
| Campesterol                                        | 0.93 | 0.86 | 1.35 | 0.187220.347030.020160.170270.002540.10670<br>4133 5211 1739 9576 7023 8392 |
| 5alpha-pregnan-3alpha,20beta-diol disulfate        | 0.63 | 0.8  | 0.66 | 0.030220.135180.450480.428920.111900.20608<br>1029 2436 0793 5104 6907 2563 |

|                                    |      |      |      |                                                                             |
|------------------------------------|------|------|------|-----------------------------------------------------------------------------|
| Taurocholate                       | 0.85 | 1.89 | 1.32 | 0.472980.536140.086430.249170.327580.34588<br>5265 819 9012 401 6281 4915   |
| Deoxycholate                       | 1.45 | 0.9  | 1.87 | 0.432810.527160.843080.549400.072950.18874<br>4259 9475 4398 9701 96 5601   |
| tauroolithocholate 3-sulfate       | 0.89 | 0.93 | 1.23 | 0.315480.449990.843600.549400.058840.18785<br>9448 0312 3129 9701 4049 1722 |
| N1-methylinosine                   | 0.94 | 0.98 | 1.04 | 0.056600.181440.903580.562720.635160.48792<br>0128 5265 1476 6338 1329 7107 |
| Urate                              | 0.82 | 0.91 | 1.19 | 0.238580.396280.401600.420350.011170.13539<br>8932 6516 6355 1028 0651 9681 |
| Allantoin                          | 0.88 | 0.89 | 1.02 | 0.076640.207460.232590.352810.485820.42615<br>9013 731 9777 5194 6079 6545  |
| allantoic acid                     | 0.64 | 0.82 | 0.79 | 0.053750.175370.212760.348910.259990.30539<br>2295 0861 0975 5076 5112 9567 |
| 1-methylhypoxanthine               | 0.84 | 0.77 | 1.11 | 0.030480.135330.012830.153810.196670.26291<br>8942 1759 1403 5112 8548 4591 |
| N1-methyladenosine                 | 0.96 | 0.9  | 1.16 | 0.191810.352490.039030.204300.005390.12793<br>4596 4816 5055 6918 3902 2774 |
| N6-carbamoylthreonyladenosine      | 0.88 | 0.9  | 1.06 | 0.026920.127360.263060.358690.464920.42114<br>7593 1579 4438 8521 4343 9515 |
| N6-succinyladenosine               | 0.79 | 0.82 | 0.95 | 0.018730.110700.437700.426540.551950.45405<br>3758 8667 9383 8407 4338 6179 |
| 7-methylguanine                    | 0.94 | 0.93 | 1.16 | 0.045970.164480.123660.280270.027430.15765<br>6293 9242 7099 9855 2435 4649 |
| N2,N2-dimethylguanosine            | 0.84 | 0.95 | 1.36 | 0.106050.251830.415390.425810.066390.18874<br>2672 499 5887 1742 1818 5601  |
| N2,N2-dimethylguanine              | 1.02 | 0.92 | 1.06 | 0.563840.575850.407550.420350.054020.18647<br>9463 8067 4544 1028 8857 039  |
| Uracil                             | 0.9  | 0.81 | 1.29 | 0.518090.554610.089890.251300.434340.40214<br>7528 7586 6064 6182 9828 8846 |
| 5,6-dihydrouridine                 | 0.94 | 0.88 | 1.08 | 0.034590.138620.047370.209210.054150.18647<br>384 355 1729 9498 2154 039    |
| 2'-O-methyluridine                 | 0.92 | 0.95 | 1.12 | 0.050840.171320.475910.435200.113690.20860<br>695 6585 5174 2513 2878 7394  |
| 2'-deoxyuridine                    | 0.75 | 0.77 | 1.02 | 0.042260.156350.254370.358060.880950.58494<br>9016 0139 6428 3602 3472 1523 |
| 3-ureidoisobutyrate                | 0.92 | 0.89 | 1.09 | 0.014600.100300.118540.278350.055450.18785<br>2265 9412 8862 0496 2665 1722 |
| 3-ureidopropionate                 | 0.93 | 0.95 | 1.06 | 0.011390.095650.045980.204980.130090.22096<br>9815 178 6634 2734 5511 2005  |
| N-acetyl-beta-alanine              | 0.96 | 0.98 | 1.3  | 0.542880.567500.788630.535490.010230.13539<br>7735 7603 1905 1275 243 9681  |
| 3-(3-amino-3-carboxypropyl)uridine | 0.78 | 0.79 | 1.17 | 0.009570.091950.031760.204300.092640.20282<br>281 3548 1052 6918 8042 035   |
| Cytidine                           | 0.85 | 0.93 | 1.32 | 0.088280.227430.288140.369070.140080.22428<br>8691 5258 86 298 465 8963     |
| 5-methylcytidine                   | 0.93 | 0.96 | 1.11 | 0.210160.370020.579090.480650.059080.18785<br>2159 7028 3959 1673 2732 1722 |
| N4-acetylcytidine                  | 0.93 | 0.95 | 0.95 | 0.026720.127360.450840.428920.845320.57821<br>7862 1579 0128 5104 9946 0425 |
| 2'-deoxycytidine                   | 0.92 | 0.93 | 1.09 | 0.025360.127360.070740.235120.019690.14932<br>979 1579 0726 1437 3262 7958  |
| 5-methyl-2'-deoxycytidine          | 1.15 | 1    | 1.2  | 0.006530.069860.690650.512600.085750.19882<br>8434 8387 0206 3558 806 7981  |

|                                    |      |      |      |                                                                    |
|------------------------------------|------|------|------|--------------------------------------------------------------------|
| 5-hydroxymethylcytidine            | 0.94 | 1.34 | 0.99 | 0.048780.169520.328010.391130.858660.580918188728676402357110098   |
| 5-hydroxymethyl-2'-deoxycytidine   | 0.94 | 0.98 | 1.11 | 0.069380.199190.600690.490120.083900.19805586137272408803964574444 |
| 3-aminoisobutyrate                 | 1.31 | 1.24 | 1.12 | 0.126890.272200.017930.162270.389170.3794857254588419835674366617  |
| nicotinate ribonucleoside          | 0.56 | 0.68 | 1.15 | 0.384070.499140.043760.204300.535960.4468508277713735691880567032  |
| Nicotinamide                       | 0.9  | 0.89 | 1.19 | 0.098830.240640.002090.066390.189100.2541961420195292046915156992  |
| nicotinamide riboside              | 0.87 | 0.8  | 1.03 | 0.709810.632540.044560.204300.892010.5885738644221824691879017333  |
| trigonelline (N'-methylnicotinate) | 1.04 | 1.03 | 1.25 | 0.403380.513830.736080.524410.042470.17785349314146744352505533564 |
| N1-Methyl-2-pyridone-5-carboxamide | 1.13 | 0.94 | 1.13 | 0.093760.235240.625250.492940.347910.360926033393886412564857854   |
| Pantothenate                       | 0.93 | 1.04 | 0.97 | 0.058980.185190.178590.331960.672060.5096188944148951214224676072  |
| ascorbic acid 3-sulfate            | 0.82 | 0.81 | 1.16 | 0.087140.227120.434970.426540.220240.27884954624841366840740258593 |
| Threonate                          | 0.91 | 0.9  | 1.17 | 0.092920.235240.153470.310430.184650.25023883839385364532473810224 |
| oxalate (ethanedioate)             | 0.92 | 0.93 | 1    | 0.085200.224500.235600.352810.946190.60105737790317146519474161521 |
| gulonate                           | 0.92 | 0.77 | 1.1  | 0.005350.063010.180280.332530.144060.22628015915149574665308280918 |
| alpha-tocopherol                   | 1.1  | 0.97 | 1.06 | 0.015980.103620.465500.433220.203120.26732279247190423274110934439 |
| alpha-tocotrienol                  | 1.07 | 0.99 | 1.43 | 0.613020.599540.893540.560600.015020.1477005857752578689271840418  |
| gamma-tocotrienol                  | 1.13 | 1.32 | 0.44 | 0.099780.241920.252220.356070.054050.186474042729419732109708039   |
| gamma-tocopherol/beta-tocopherol   | 1.14 | 0.99 | 1.39 | 0.181770.340540.621280.492940.008560.1346923817669385925645480715  |
| Pterin                             | 0.93 | 0.78 | 1.16 | 0.612390.599540.096730.257850.099520.20422235677521352702361699374 |
| Heme                               | 0.46 | 0.59 | 0.79 | 0.426100.522020.031000.204300.650040.4959138369768209669185572883  |
| Biliverdin                         | 0.65 | 0.95 | 1.07 | 0.076330.207460.667190.505810.866580.582624067313393002190790204   |
| retinol (Vitamin A)                | 0.96 | 0.97 | 1.26 | 0.124240.269530.654970.503650.074070.18874844218225152899356835601 |
| carotene diol (1)                  | 1.02 | 0.95 | 1.36 | 0.914620.681990.423520.425810.048030.18293579160864874174219827852 |
| carotene diol (2)                  | 1.07 | 0.97 | 1.21 | 0.273150.420310.644460.501170.154030.233241636343434495709927518   |
| beta-cryptoxanthin                 | 0.95 | 0.78 | 1.26 | 0.592090.587040.129850.283120.011580.13539900859291653041708149681 |
| pyridoxine (Vitamin B6)            | 0.68 | 0.78 | 1.12 | 0.589100.586080.050470.213130.625770.48283141279642753832992616437 |
| Pyridoxamine                       | 0.94 | 0.59 | 1.04 | 0.359060.482950.038240.204300.972510.60622051499161344691854693646 |
| Pyridoxal                          | 1.07 | 1    | 1.23 | 0.264470.416970.820130.542970.012470.1363482064539109812856549172  |

|                                     |       |       |       |                                                                             |
|-------------------------------------|-------|-------|-------|-----------------------------------------------------------------------------|
| Pyridoxate                          | 0.99  | 0.9   | 1.46  | 0.655590.620160.397720.420350.018510.14932<br>0677 0317 9529 1028 6066 7958 |
| 4-allylcatechol sulfate             | 3.58  | 2.86  | 2.92  | 3.536760.004088.149720.000980.014410.14770<br>E-05 1657 E-06 0826 2119 0418 |
| 4-acetylphenol sulfate              | 1.65  | 0.97  | 1.48  | 0.076750.207460.466930.433220.405880.38578<br>0277 731 4125 2741 8327 3066  |
| 4-ethylphenylsulfate                | 1.31  | 0.99  | 2.57  | 0.236780.395580.796940.539890.027700.15765<br>5736 7774 3771 8054 4806 4649 |
| Theophylline                        | 35.37 | 44.08 | 42.57 | 8.74E- 5.05E- 8E-11 3.807E- 1.231620.00619<br>12 09 08 E-05 1873            |
| 2-oxindole-3-acetate                | 0.95  | 0.78  | 1.58  | 0.518900.554610.077840.244920.019070.14932<br>9392 7586 0965 1099 4105 7958 |
| beta-guanidinopropanoate            | 1.18  | 1.23  | 1.71  | 0.097050.238300.122870.280270.018780.14932<br>2495 8523 0609 9855 8592 7958 |
| dihydrocaffeate sulfate             | 1.66  | 0.42  | 2.65  | 0.276650.422330.410980.422750.071790.18874<br>8986 1731 3689 4413 109 5601  |
| Cinnamoylglycine                    | 0.55  | 0.65  | 2.72  | 0.044030.158820.930550.569210.175380.24426<br>7758 0276 3503 4603 4588 7837 |
| Ergothioneine                       | 1.25  | 1.18  | 1.49  | 0.005860.067710.028000.201000.007370.12793<br>7643 6481 892 9166 96 2774    |
| Erythritol                          | 0.99  | 0.81  | 0.86  | 0.907530.681540.389680.415030.019930.14932<br>4913 1341 5355 533 9828 7958  |
| Homostachydrine                     | 0.96  | 0.97  | 1.29  | 0.424270.522020.571860.477950.028220.15765<br>851 9768 9867 185 2942 4649   |
| indolin-2-one                       | 0.99  | 0.7   | 1.64  | 0.775840.656810.015270.153810.074780.18874<br>0453 5353 12 5112 2827 5601   |
| Mannonate                           | 0.89  | 0.85  | 0.93  | 0.026560.127360.055530.222790.616150.48100<br>7253 1579 6039 3784 3117 5215 |
| methyl indole-3-acetate             | 0.9   | 0.8   | 2.07  | 0.314920.449990.354070.404180.000960.06744<br>8704 0312 7028 1603 6897 0674 |
| Stachydrine                         | 0.92  | 0.85  | 1.13  | 0.038350.149240.127820.283120.209540.27081<br>1725 289 6271 0417 4061 5026  |
| Tartarate                           | 0.59  | 0.93  | 1.22  | 0.033570.138620.841370.549400.255090.30319<br>9036 355 7193 9701 9229 0633  |
| 4-vinylguaiacol sulfate             | 0.85  | 0.84  | 0.83  | 0.229870.390130.989420.587170.065140.18874<br>7743 8436 516 7628 8978 5601  |
| Pyrraline                           | 0.9   | 0.76  | 1.04  | 0.279550.424500.071320.235180.844960.57821<br>3664 4525 7984 8731 4059 0425 |
| eugenol sulfate                     | 33.99 | 28.82 | 21.9  | 7.06E- 2.036469.6877E0.000230.005830.12793<br>09 E-06 -07 3185 5333 2774    |
| (2,4 or 2,5)-dimethylphenol sulfate | 0.6   | 0.71  | 0.73  | 0.001070.036730.148160.304820.313450.33600<br>9852 4416 9362 5975 1737 4304 |
| tartronate (hydroxymalonate)        | 0.94  | 0.87  | 1.01  | 0.234670.395580.090830.251300.847000.57833<br>803 7774 2863 6182 9083 8356  |
| (S)-a-amino-omega-caprolactam       | 0.97  | 0.94  | 1.12  | 0.320490.451590.213800.348910.058780.18785<br>7386 1034 7277 5076 0707 1722 |
| Salicylate                          | 1.43  | 0.9   | 1.57  | 0.094660.236460.959780.579000.229410.28548<br>1156 1563 599 3158 4347 6917  |
| 2,6-dihydroxybenzoic acid           | 1.08  | 0.82  | 1.19  | 0.830700.665060.283380.368900.028160.15765<br>2428 1193 8183 9448 2975 4649 |
| sulfate                             | 0.93  | 0.9   | 1.05  | 0.015050.100990.001720.066390.018950.14932<br>201 428 5458 0469 2995 7958   |
| O-sulfo-L-tyrosine                  | 0.94  | 0.87  | 1.22  | 0.120470.264820.041570.204300.041000.17470<br>8986 94 8312 6918 6301 9125   |

|                                                                    |       |      |       |         |         |         |         |         |         |
|--------------------------------------------------------------------|-------|------|-------|---------|---------|---------|---------|---------|---------|
| Ectoine                                                            | 1.15  | 1.09 | 1.74  | 0.27848 | 0.42399 | 0.78364 | 0.53549 | 0.04884 | 0.18462 |
|                                                                    |       |      |       | 5031    | 758     | 4856    | 1275    | 7657    | 9535    |
| 1,2,3-benzenetriol sulfate (2)                                     | 11.31 | 2.23 | 15.29 | 0.00120 | 0.03673 | 0.01366 | 0.15381 | 0.00936 | 0.13469 |
|                                                                    |       |      |       | 2898    | 4416    | 0554    | 5112    | 1435    | 0715    |
| 3-hydroxypyridine sulfate                                          | 1.16  | 0.67 | 1.95  | 0.61850 | 0.60185 | 0.04828 | 0.21131 | 0.13640 | 0.22345 |
|                                                                    |       |      |       | 4072    | 0467    | 5281    | 557     | 0431    | 5259    |
| 6-hydroxyindole sulfate                                            | 0.72  | 0.65 | 1.8   | 0.76982 | 0.65544 | 0.71636 | 0.51698 | 0.05978 | 0.18785 |
|                                                                    |       |      |       | 4817    | 8768    | 2442    | 4541    | 0856    | 1722    |
| glycine conjugate of C10H14O2 (1)                                  | 0.8   | 0.72 | 0.89  | 0.01109 | 0.09558 | 0.05501 | 0.22256 | 0.81966 | 0.56838 |
|                                                                    |       |      |       | 8348    | 3799    | 7378    | 7807    | 4099    | 8012    |
| branched-chain, straight-chain, or cyclopropyl 10:1 fatty acid (1) | 0.85  | 0.94 | 1.37  | 0.03445 | 0.13862 | 0.43570 | 0.42654 | 0.07493 | 0.18874 |
|                                                                    |       |      |       | 7902    | 355     | 5267    | 8407    | 9513    | 5601    |
| branched-chain, straight-chain, or cyclopropyl 12:1 fatty acid     | 0.63  | 0.75 | 1.03  | 0.17018 | 0.32734 | 0.02319 | 0.18595 | 0.76756 | 0.54813 |
|                                                                    |       |      |       | 9507    | 9933    | 1077    | 5146    | 1062    | 4677    |
